# Supplementary material for: The Effect of Continuous Glucose Monitoring in Well-Controlled Type 1 Diabetes
Source: Oxford University Press journal article supplement (doi:10.2337/dc09-0108), 2009-05-08
Supplement: dc090108-sup-dc60.doc [file dc090108-sup-dc60.doc]

**Table A1**. Severe Hypoglycemic Events by Treatment Group

|  | **Treatment Group** | |  |
| --- | --- | --- | --- |
|  | **CGM** | **Control** | **P value*** |
| **N=67** | **N=62** |
| **Severe Hypoglycemic Events** |  |  |  |
| Subjects with >1 event - *no. (%)* | 7 (10) | 7 (11) | 1.0 |
| Events per subject – *no. (%)* |  |  |  |
| 0 | 60 (90) | 55 (89) |  |
| 1 | 5 (7) | 4 (6) |  |
| 2 | 2 (3) | 3 (5) |  |
| Incidence rate *(events* *per 100 person-years*) | 27.1 | 33.1 | 0.71 |
| Treatment group difference (95% CI) | -6.0 (-38.0 to +26.3) | |  |
|  |  |  |  |
| **Severe Hypoglycemic Events with Seizure/Coma** |  |  |  |
| Subjects with >1 event *no. (%)* | 3 (4) | 2 (3) | 1.0 |
| Events per subject - *no. (%)* |  |  |  |
| 0 | 64 (96) | 60 (97) |  |
| 1 | 2 (3) | 2 (3) |  |
| 2 | 1 (1) | 0 |  |
| Incidence rate *(events* *per 100 person-years*) | 12.1 | 6.6 | 0.73 |
| Treatment group difference (95% CI) | +5.5 (-12.0 to +22.5) | |  |

*Fisher’s exact tests were used to compare the percentages of subjects in each treatment group with at least one hypoglycemic event; permutation tests were used for comparing the incidence rates and computing the confidence intervals.

**Figure A1.** Flow chart of the study visits showing visit and study completion.

**Figure A2.** Cumulative distribution of CGM-measured hypoglycemic values 70 mg/dL or below according to treatment group. The CGM data were obtained following the 13-week and 26-week visits with the control group using a CGM device modified so that the glucose values were stored but could not be seen and the CGM group using a standard CGM device.

**Cumulative Distribution**

**Sensor Glucose (mg/dL)**

**≤**

**≤**

**≤**

**≤**

**Figure A3.** Cumulative distribution of time per day with glucose values in the hypoglycemic range for values (a) ≤70 mg/dL, (b) ≤60 mg/dL, and (c) ≤50 mg/dL. The CGM data were obtained following the 13-week and 26-week visits with the control group using a CGM device modified so that the glucose values were stored but could not be seen and the CGM group using a standard CGM device.

**Figure A4**. Scatter plot of change from baseline to 26 weeks in HbA1c versus time per day with glucose level <70 mg/dL. Glucose levels were measured with a blinded CGM device at baseline in all subjects and unblinded in the CGM group and blinded in the control group at 26 weeks. The dashed lines denote the thresholds for defining improvement and worsening: change from baseline of 0.3% for HbA1c and change from baseline in time < 70 mg/dL of 43 minutes per day (3% of the day). Negative values for both measures indicate improvement. Thus, the upper right section of the figure represents improvement on both measures and the lower left represents worsening.
